# Supplementary material
Source: PubMed Central journal article supplement (PMC8500648)
Supplement: NIHMS1744853-supplement-Supplemental_Table_1.pdf [file NIHMS1744853-supplement-Supplemental_Table_1.pdf]

Table S1: HLA risk alleles associations with DHRs

| Drug                    | HLA Risk Allele     | Reaction       | Ethnic Population      | PPV (NPV)*   | Key Ref. |
|-------------------------|---------------------|----------------|------------------------|--------------|----------|
| <b>Antibiotics</b>      |                     |                |                        |              |          |
| Amoxicillin-clavulanate | DRB1*15:01          | DILI           | Caucasian              |              | (1)      |
|                         | DQB1*0602           |                |                        |              |          |
|                         | A*02:01             |                |                        |              |          |
| Benznidazole            | A*11:01             | MPE, DRESS     | Bolivian               | 100 (70)     | (2)      |
|                         | A*29:02             |                |                        | 100 (70)     |          |
|                         | A*68                |                |                        | 48 (84)      |          |
| Dapsone                 | B*13:01             | DRESS          | Chinese                | 7.8 (99.8)   | (3)      |
|                         |                     | DRESS, SJS/TEN | Thai                   |              | (4)      |
|                         |                     | DRESS          | Taiwanese<br>Malaysian |              | (5)      |
| Flucloxacillin          | B*53:01             | DILI           | European               |              | (6)      |
|                         | B*57:01             |                | Caucasian              | 0.12 (99.99) | (7)      |
| Minocycline             | B*35:02             | DILI           | Caucasian              |              | (8)      |
| Sulfamethoxazole        | A*29                | SJS/TEN        | Caucasian              |              | (9)      |
|                         | A*30                | FDE            | Turkish                |              | (10)     |
|                         | A*30-B*13-C*06      |                |                        |              |          |
|                         | A*11:01             | SJS/DRESS      | Japanese               |              | (11)     |
|                         | B*13:01             | SCAR           | Asian                  | 4.05 (99.92) | (12)     |
|                         |                     | DRESS          |                        | 3.64 (99.92) |          |
|                         | B*14:01             | DILI           | European American      |              | (13)     |
|                         | B*35:01             |                | African American       |              | (13)     |
|                         | B*44 (B12 serotype) | SJS/TEN        | Caucasian              |              | (9)      |
|                         | B*38                |                | Caucasian              |              | (14)     |
| DR*07                   | Caucasian           |                |                        | (9)          |          |
| Terbinafine             | A*33:01             | DILI           | European               |              | (15)     |
| Vancomycin              | A*32:01             | DRESS          | Caucasian              |              | (16)     |
| <b>Anticonvulsants</b>  |                     |                |                        |              |          |
| Carbamazepine           | A*02:01             | MPE            | Han Chinese            |              | (17)     |
|                         | A*24:02             | SJS/TEN        | Han Chinese            |              | (18)     |
|                         | A*31                | DRESS,         | Japanese               |              | (19)     |

|             |                     |                        |             |                  |          |
|-------------|---------------------|------------------------|-------------|------------------|----------|
|             |                     | SJS/TEN, MPE           |             |                  |          |
|             | A*31:01             | DRESS                  | Caucasian   | 0.77<br>(99.98)  | (20)     |
|             |                     |                        | Han Chinese | 0.67<br>(99.97)  | (20)     |
|             |                     | SJS/TEN                | Caucasian   |                  | (21)     |
|             |                     |                        | Han Chinese |                  | (20)     |
|             |                     | DRESS,<br>SJS/TEN      | Korean      |                  | (22)     |
|             | SCAR, DILI          | Caucasian              |             | (23)             |          |
|             | B*15:02             | SJS/TEN                | Han Chinese | 2.24<br>(99.94)  | (20, 24) |
|             |                     |                        | Indian      |                  | (25)     |
|             |                     |                        | Korean      |                  | (24)     |
|             |                     |                        | Malaysian   |                  | (24)     |
|             |                     |                        | Thai        |                  | (24, 26) |
|             | B*15:11             | SJS/TEN                | Taiwanese   | 93.6<br>(100)    | (27)     |
|             |                     |                        | Han Chinese |                  | (18)     |
|             | B*15:21             | SJS/TEN                | Asian       | 43.8<br>(95.1)   | (28)     |
|             |                     |                        | Thai        |                  | (26)     |
|             | B*51:01             | SJS/TEN                | Filipino    | 1.03<br>(87.5)   | (29)     |
|             |                     |                        | SJS/TEN     |                  |          |
|             | B*57:01             | DRESS, MPE             | Han Chinese |                  | (28)     |
|             | B*58:01             | SJS/TEN                | Caucasian   |                  | (30)     |
|             | B*58:01             | DRESS, MPE             | Asian       | 90.4<br>(37)     | (26, 28) |
|             | DRB1*14:05          | MPE                    | Han Chinese |                  | (17)     |
| Lamotrigine | A*02:07             | MPE, DRESS,<br>SJS/TEN | Thai        |                  | (31)     |
|             | A*24:02,<br>C*01:02 | MPE                    | Korean      |                  | (32)     |
|             | A*30:01             |                        | Han Chinese |                  | (17)     |
|             | B*13:02             |                        | Thai        |                  | (31)     |
|             | A*33:03             |                        |             |                  |          |
|             | B*44:03             |                        |             |                  |          |
|             | A*31:01             | DRESS,<br>SJS/TEN      | Korean      |                  | (33)     |
|             | A*68:01             | DRESS,<br>SJS/TEN      | Caucasian   |                  | (34)     |
|             | B*15:02             | SJS/TEN                | Han Chinese |                  | (35)     |
|             |                     | DRESS,<br>SJS/TEN, MPE | Thai        |                  | (31)     |
|             |                     | SJS/TEN                | Iranian     | 78.57<br>(56.41) | (36)     |
|             | B*38                | SJS/TEN                | Caucasian   |                  | (14)     |
|             | B*58:01             | DRESS,<br>SJS/TEN      | Caucasian   |                  | (34)     |
| C*07:18     |                     |                        |             |                  |          |

|                        |                                                      |                        |                          |               |          |
|------------------------|------------------------------------------------------|------------------------|--------------------------|---------------|----------|
|                        | DQB1*06                                              |                        |                          |               |          |
|                        | DRB1*13                                              |                        |                          |               |          |
| Oxcarbazepine          | A*03:01                                              | MPE                    | Uighur<br>Chinese        |               | (37)     |
|                        | B*07:02                                              |                        |                          |               |          |
|                        | B*15:02                                              | MPE, SJS/TEN           | Han Chinese              |               | (38)     |
|                        | B*38:02                                              | MPE                    |                          |               | (39)     |
| Phenobarbital          | B*51:01                                              | SJS/TEN                | Japanese                 |               | (40)     |
| Phenytoin              | B*13:01                                              | SJS/TEN                | East Asian               |               | (41)     |
|                        | B*15:02                                              | SJS/TEN                | East Asian               |               | (41)     |
|                        |                                                      |                        | Han Chinese              |               | (35)     |
|                        |                                                      |                        | Malaysian                |               | (42)     |
|                        |                                                      |                        | Thai                     | 33 (100)      | (43)     |
|                        | B*15:13                                              | DRESS,<br>SJS/TEN      | Malaysian                |               | (42)     |
|                        | B*56:02                                              | SJS/TEN                | Thai                     |               | (44)     |
|                        |                                                      | DRESS                  | Australian<br>Aboriginal |               | (45)     |
|                        |                                                      | Cw*08:01<br>DRB1*16:02 | SJS/TEN                  | Han Chinese   |          |
| Zonisamide             | A*02:07                                              | SJS/TEN                | Japanese                 |               | (40)     |
| <b>Antiretrovirals</b> |                                                      |                        |                          |               |          |
| Abacavir               | B*57:01                                              | HSS                    | African                  | 50 (100)      | (47)     |
|                        |                                                      |                        | Caucasian                | 50 (100)      | (48, 49) |
|                        |                                                      |                        | Hispanic                 | 96 (60)       | (50)     |
| Nevirapine             | Cw4                                                  | DRESS                  | Han Chinese              |               | (51)     |
|                        | C*04:01                                              | SJS/TEN                | Malawian                 | 2.6<br>(99.2) | (52, 53) |
|                        | C*08                                                 | DRESS                  | Japanese                 |               | (54)     |
|                        | C*08:02,<br>B*14:02                                  | DRESS                  | Caucasian<br>(Sardinian) |               | (55)     |
|                        | B*35:05                                              | Skin Rash              | Thai                     |               | (56)     |
|                        | DRB1*01:01                                           | DRESS                  | Caucasian                |               | (57)     |
| Raltegravir            | B*53:01                                              | DRESS                  | African                  |               | (58)     |
| <b>Other drugs</b>     |                                                      |                        |                          |               |          |
| Acetazolamide          | B*59                                                 | SJS/TEN                | Korean                   |               | (59)     |
| Asparaginase           | DQB1*02:0<br>2-<br>DRB1*07:01<br>-<br>DQA1*02:0<br>1 |                        | European                 |               | (60)     |
|                        | DRB1*02:01                                           | Anaphylaxis            |                          | Caucasian     |          |
|                        | DRB1*07:01                                           |                        |                          |               | (61)     |
| Allopurinol            | B*58:01                                              | DRESS,                 | Caucasian                |               | (62)     |

|                             |            |                   |                           |                 |          |      |
|-----------------------------|------------|-------------------|---------------------------|-----------------|----------|------|
|                             |            | SJS/TEN           |                           |                 |          |      |
|                             |            | DRESS             | Caucasian<br>(Portuguese) |                 | (63)     |      |
|                             |            | DRESS,<br>SJS/TEN | Han Chinese               | 3 (100)         | (64)     |      |
|                             |            | DRESS,<br>SJS/TEN | Korean                    | 2.06<br>(99.98) | (65)     |      |
|                             |            | DRESS             | Thai                      | 8.26<br>(100)   | (66)     |      |
|                             |            | MPE, SJS/TEN      | Japanese                  |                 | (62, 67) |      |
|                             |            | MPE               | Thai                      | 5.13<br>(99.90) | (66)     |      |
|                             |            | SJS/TEN           | Caucasian                 |                 | (14, 68) |      |
|                             |            |                   | Thai                      | 10.48<br>(100)  | (66)     |      |
|                             | C*03:02    | DRESS,<br>SJS/TEN | Korean                    | 1.77<br>(99.98) | (65)     |      |
|                             | A*33:02    | DRESS,<br>SJS/TEN | Korean                    | 0.8<br>(99.96)  | (65)     |      |
| Carbimazole/<br>Methimazole | B*27:05    | Agranulocytosis   | European                  |                 | (69)     |      |
|                             | B*38:02    |                   | Han Chinese               |                 | (69)     |      |
|                             | DRB1*08:03 |                   | Han Chinese               |                 | (69)     |      |
| Fenofibrate                 | A*33:01    | DILI              | European                  |                 | (70)     |      |
| Flupirtine                  | DRB1*15:01 | DILI              | European                  |                 | (71)     |      |
| Isoxicam                    | A*02       | SJS/TEN           | Caucasian                 |                 | (9)      |      |
|                             | B*12       |                   |                           |                 |          |      |
| Lapatinib                   | DRB1*07:01 | DILI              | Caucasian                 |                 | (72)     |      |
|                             |            |                   | East Asian                |                 |          |      |
| Lumiracoxib                 | DRB1*15:01 | DILI              | Caucasian                 | 8 (98.9)        | (73)     |      |
| Methazolamide               | B*59:01    | SJS/TEN           | Japanese                  |                 | (74)     |      |
|                             |            |                   | Korean                    |                 |          | (75) |
|                             |            |                   | Han Chinese               |                 |          |      |
| Methimazole                 | C*03:02    | DILI              | Chinese                   |                 | (77)     |      |
| Oxicams                     | B*73       | SJS/TEN           | Caucasian                 |                 | (14)     |      |
| Penicillin                  | DRB1*10:01 | Anaphylaxis       | Caucasian                 |                 | (78)     |      |
|                             | B*55:01    |                   | European                  |                 | (79)     |      |
| Statins                     | DRB1*11:01 | NAM               | Pacific<br>Islander       |                 | (80)     |      |
| Strontium<br>Renalate       | A*33:03    | SJS/TEN           | Han Chinese               |                 | (81)     |      |
| Sulfasalazine               | B*13:01    | DRESS             | Han Chinese               |                 | (82)     |      |
| Ticlopidine                 | A*33:03    | DILI              | Japanese                  |                 | (83)     |      |
| Ximelagatran                | DRB1*07:01 | DILI              | European                  |                 | (84)     |      |

- (1) Lucena, M.I. *et al.* Susceptibility to Amoxicillin-Clavulanate-Induced Liver Injury Is Influenced by Multiple HLA Class I and II Alleles. *Gastroenterology (New York, NY 1943)* **141**, 338-47 (2011).
- (2) Balas, A. *et al.* HLA-A\* 68,-A\* 11: 01, and-A\* 29: 02 alleles are strongly associated with benzimidazole-induced maculopapular exanthema (MPE)/DRESS. *The Journal of Allergy and Clinical Immunology: In Practice*, (2020).
- (3) Zhang, F.-R. *et al.* HLA-B\* 13: 01 and the dapsone hypersensitivity syndrome. *New England Journal of Medicine* **369**, 1620-8 (2013).
- (4) Tempark, T. *et al.* Dapsone-induced severe cutaneous adverse drug reactions are strongly linked with HLA-B\*13: 01 allele in the Thai population. *Pharmacogenet Genomics* **27**, 429-37 (2017).
- (5) Chen, W.T. *et al.* The Function of HLA-B\*13:01 Involved in the Pathomechanism of Dapsone-Induced Severe Cutaneous Adverse Reactions. *The Journal of investigative dermatology* **138**, 1546-54 (2018).
- (6) Nicoletti, P. *et al.* Drug-Induced Liver Injury due to Flucloxacillin: Relevance of Multiple Human Leukocyte Antigen Alleles. *Clinical Pharmacology & Therapeutics* **106**, 245-53 (2019).
- (7) Daly, A.K. *et al.* HLA-B5701 genotype is a major determinant of drug-induced liver injury due to flucloxacillin. *Nature genetics* **41**, 816-9 (2009).
- (8) Urban, T.J. *et al.* Minocycline hepatotoxicity: Clinical characterization and identification of HLA-B\*35:02 as a risk factor. *Journal of Hepatology* **67**, 137-44 (2017).
- (9) Roujeau, J.C., Huynh, T.N., Bracq, C., Guillaume, J.C., Revuz, J. & Touraine, R. Genetic susceptibility to toxic epidermal necrolysis. *Arch Dermatol* **123**, 1171-3 (1987).
- (10) Özkaya-Bayazit, E. & Akar, U. Fixed drug eruption induced by trimethoprim-sulfamethoxazole: Evidence for a link to HLA-A30 B13 Cw6 haplotype. *Journal of the American Academy of Dermatology* **45**, 712-7 (2001).
- (11) Nakamura, R. *et al.* Association of HLA-A\*11:01 with Sulfonamide-Related Severe Cutaneous Adverse Reactions in Japanese Patients. *Journal of Investigative Dermatology* **140**, 1659-62.e6 (2020).
- (12) Wang, C.-W. *et al.* Whole genome sequencing identifies genetic variants associated with cotrimoxazole hypersensitivity in Asians. *Journal of Allergy and Clinical Immunology*.
- (13) Li, Y.-J. *et al.* HLA-B14:01 and HLA-B35:01 are associated with trimethoprim-sulfamethoxazole induced liver injury. *Hepatology (Baltimore, Md)*, (2020).
- (14) Lonjou, C. *et al.* A European study of HLA-B in Stevens–Johnson syndrome and toxic epidermal necrolysis related to five high-risk drugs. *Pharmacogenetics and Genomics* **18**, 99-107 (2008).
- (15) Fontana, R.J. *et al.* The role of HLA-A\*33:01 in patients with cholestatic hepatitis attributed to terbinafine. *Journal of Hepatology* **69**, 1317-25 (2018).
- (16) Konvinse, K.C. *et al.* HLA-A\*32:01 is strongly associated with vancomycin-induced drug reaction with eosinophilia and systemic symptoms. *J Allergy Clin Immunol* **144**, 183-92 (2019).
- (17) Li, L.-J., Hu, F.-Y., Wu, X.-T., An, D.-M., Yan, B. & Zhou, D. Predictive markers for carbamazepine and lamotrigine-induced maculopapular exanthema in Han Chinese. *Epilepsy research* **106**, 296-300 (2013).
- (18) Shi, Y.-W. *et al.* Association between HLA and Stevens–Johnson Syndrome Induced by Carbamazepine in Southern Han Chinese: Genetic Markers besides B\*1502? *Basic & Clinical Pharmacology & Toxicology* **111**, 58-64 (2012).
- (19) Niihara, H., Kakamu, T., Fujita, Y., Kaneko, S. & Morita, E. HLA-A31 strongly associates with carbamazepine-induced adverse drug reactions but not with carbamazepine-induced lymphocyte proliferation in a Japanese population. *The Journal of dermatology* **39**, 594-601 (2012).

- (20) Genin, E. *et al.* HLA-A\* 31: 01 and different types of carbamazepine-induced severe cutaneous adverse reactions: an international study and meta-analysis. *The pharmacogenomics journal* **14**, 281-8 (2014).
- (21) McCormack, M. *et al.* HLA-A\*3101 and carbamazepine-induced hypersensitivity reactions in Europeans. *The New England journal of medicine* **364**, 1134-43 (2011).
- (22) Kim, S.-H. *et al.* Carbamazepine-induced severe cutaneous adverse reactions and HLA genotypes in Koreans. *Epilepsy research* **97**, 190-7 (2011).
- (23) Nicoletti, P. *et al.* Shared Genetic Risk Factors Across Carbamazepine-Induced Hypersensitivity Reactions. *Clinical pharmacology and therapeutics* **106**, 1028-36 (2019).
- (24) Tangamornsuksan, W., Chaiyakunapruk, N., Somkrua, R., Lohitnavy, M. & Tassaneeyakul, W. Relationship Between the HLA-B\*1502 Allele and Carbamazepine-Induced Stevens-Johnson Syndrome and Toxic Epidermal Necrolysis: A Systematic Review and Meta-analysis. *JAMA Dermatology* **149**, 1025-32 (2013).
- (25) Mehta, T.Y. *et al.* Association of HLA-B\* 1502 allele and carbamazepine-induced Stevens-Johnson syndrome among Indians. *Indian Journal of Dermatology, Venereology, and Leprology* **75**, 579 (2009).
- (26) Sukasem, C. *et al.* Association between HLA-B Alleles and Carbamazepine-Induced Maculopapular Exanthema and Severe Cutaneous Reactions in Thai Patients. *Journal of immunology research* **2018**, 1-11 (2018).
- (27) Chung, W.-H. *et al.* A marker for Stevens–Johnson syndrome. *Nature* **428**, 486- (2004).
- (28) Wang, Q., Sun, S., Xie, M., Zhao, K., Li, X. & Zhao, Z. Association between the HLA-B alleles and carbamazepine-induced SJS/TEN: A meta-analysis. *Epilepsy research* **135**, 19-28 (2017).
- (29) Capule, F. *et al.* Association of carbamazepine-induced Stevens-Johnson syndrome/toxic epidermal necrolysis with the HLA-B75 serotype or HLA-B\*15:21 allele in Filipino patients. *Pharmacogenomics J* **20**, 533-41 (2020).
- (30) Mockenhaupt, M. *et al.* HLA-B\* 57: 01 confers genetic susceptibility to carbamazepine-induced SJS/TEN in Europeans. *Allergy* **74**, 2227-30 (2019).
- (31) Koomdee, N. *et al.* Association of HLA-A and HLA-B Alleles with Lamotrigine-Induced Cutaneous Adverse Drug Reactions in the Thai Population. *Frontiers in pharmacology* **8**, 879- (2017).
- (32) Moon, J. *et al.* The HLA-A\*2402/Cw\*0102 haplotype is associated with lamotrigine-induced maculopapular eruption in the Korean population. *Epilepsia* **56**, e161-7 (2015).
- (33) Kim, B.K. *et al.* HLA-A\*31:01 and lamotrigine-induced severe cutaneous adverse drug reactions in a Korean population. *Ann Allergy Asthma Immunol* **118**, 629-30 (2017).
- (34) Kazeem, G.R. *et al.* High-resolution HLA genotyping and severe cutaneous adverse reactions in lamotrigine-treated patients. *Pharmacogenet Genomics* **19**, 661-5 (2009).
- (35) Cheung, Y.-K., Cheng, S.-H., Chan, E.J.M., Lo, S.V., Ng, M.H.L. & Kwan, P. HLA-B alleles associated with severe cutaneous reactions to antiepileptic drugs in Han Chinese. *Epilepsia* **54**, 1307-14 (2013).
- (36) Sabourirad, S. *et al.* Investigating the association of Lamotrigine and Phenytoin-induced Stevens-Johnson syndrome/Toxic Epidermal Necrolysis with HLA-B\*1502 in Iranian population. *Exp Dermatol*, (2020).
- (37) Zhao, T. *et al.* The Association Between HLA-A\*03:01 and HLA-B\*07:02 Alleles and Oxcarbazepine-induced Maculopapular Eruption in the Uighur Chinese Population. *Seizure* **81**, 43-6 (2020).
- (38) Hung, S.I. *et al.* Common risk allele in aromatic antiepileptic-drug induced Stevens-Johnson syndrome and toxic epidermal necrolysis in Han Chinese. *Pharmacogenomics* **11**, 349-56 (2010).
- (39) Lv, Y.-D. *et al.* The association between oxcarbazepine-induced maculopapular eruption and HLA-B alleles in a Northern Han Chinese population. *BMC Neurology* **13**, 75 (2013).

- (40) Kaniwa, N. *et al.* Specific HLA types are associated with antiepileptic drug-induced Stevens-Johnson syndrome and toxic epidermal necrolysis in Japanese subjects. *Pharmacogenomics* **14**, 1821-31 (2013).
- (41) Su, S.C. *et al.* HLA Alleles and CYP2C9\*3 as Predictors of Phenytoin Hypersensitivity in East Asians. *Clinical pharmacology and therapeutics* **105**, 476-85 (2019).
- (42) Chang, C.C. *et al.* Association of HLA-B\*15:13 and HLA-B\*15:02 with phenytoin-induced severe cutaneous adverse reactions in a Malay population. *The Pharmacogenomics Journal* **17**, 170-3 (2017).
- (43) Locharernkul, C. *et al.* Carbamazepine and phenytoin induced Stevens-Johnson syndrome is associated with HLA-B\* 1502 allele in Thai population. *Epilepsia* **49**, 2087-91 (2008).
- (44) Tassaneeyakul, W. *et al.* Associations between HLA class I and cytochrome P450 2C9 genetic polymorphisms and phenytoin-related severe cutaneous adverse reactions in a Thai population. *Pharmacogenetics and Genomics* **26**, 225-34 (2016).
- (45) Somogyi, A.A., Barratt, D.T., Phillips, E.J., Moore, K., Ilyas, F. & Gabb, G.M. High and variable population prevalence of HLA-B\* 56: 02 in indigenous Australians and relation to phenytoin-associated drug reaction with eosinophilia and systemic symptoms. *British journal of clinical pharmacology* **85**, 2163-9 (2019).
- (46) Hung, S.-I. *et al.* Common risk allele in aromatic antiepileptic-drug induced Stevens–Johnson syndrome and toxic epidermal necrolysis in Han Chinese. *Pharmacogenomics* **11**, 349-56 (2010).
- (47) Saag, M. *et al.* High sensitivity of human leukocyte antigen-b\* 5701 as a marker for immunologically confirmed abacavir hypersensitivity in white and black patients. *Clinical infectious diseases* **46**, 1111-8 (2008).
- (48) Mallal, S. *et al.* HLA-B\* 5701 screening for hypersensitivity to abacavir. *New England Journal of Medicine* **358**, 568-79 (2008).
- (49) Mallal, S. *et al.* Association between presence of HLA-B\* 5701, HLA-DR7, and HLA-DQ3 and hypersensitivity to HIV-1 reverse-transcriptase inhibitor abacavir. *The Lancet* **359**, 727-32 (2002).
- (50) Sousa-Pinto, B. *et al.* Pharmacogenetics of abacavir hypersensitivity: A systematic review and meta-analysis of the association with HLA-B\*57:01. *J Allergy Clin Immunol* **136**, 1092-4.e3 (2015).
- (51) Gao, S., Gui, X.-e., Liang, K., Liu, Z., Hu, J. & Dong, B. HLA-dependent hypersensitivity reaction to nevirapine in Chinese Han HIV-infected patients. *AIDS research and human retroviruses* **28**, 540-3 (2012).
- (52) Carr, D.F. *et al.* Association of human leukocyte antigen alleles and nevirapine hypersensitivity in a Malawian HIV-infected population. *Clinical Infectious Diseases* **56**, 1330-9 (2013).
- (53) Carr, D.F. *et al.* Genome-wide association study of nevirapine hypersensitivity in a sub-Saharan African HIV-infected population. *Journal of Antimicrobial Chemotherapy* **72**, 1152-62 (2017).
- (54) Gatanaga, H. *et al.* HLA-Cw8 primarily associated with hypersensitivity to nevirapine. *AIDS* **21**, (2007).
- (55) Littera, R. *et al.* HLA-dependent hypersensitivity to nevirapine in Sardinian HIV patients. *AIDS* **20**, (2006).
- (56) Chantarangsu, S. *et al.* HLA-B\* 3505 allele is a strong predictor for nevirapine-induced skin adverse drug reactions in HIV-infected Thai patients. *Pharmacogenetics and genomics* **19**, 139-46 (2009).
- (57) Martin, A.M. *et al.* Predisposition to nevirapine hypersensitivity associated with HLA-DRB1\*0101 and abrogated by low CD4 T-cell counts. *AIDS (London, England)* **19**, 97-9 (2005).

- (58) Thomas, M. *et al.* Association of the HLA-B\*53:01 Allele With Drug Reaction With Eosinophilia and Systemic Symptoms (DRESS) Syndrome During Treatment of HIV Infection With Raltegravir. *Clinical Infectious Diseases* **64**, 1198-203 (2017).
- (59) Her, Y., Kil, M.S., Park, J.H., Kim, C.W. & Kim, S.S. Stevens–Johnson syndrome induced by acetazolamide. *The Journal of Dermatology* **38**, 272-5 (2011).
- (60) Liu, Y. *et al.* Class II HLA Variants Associate with Risk of Pegaspargase Hypersensitivity. *Clinical pharmacology and therapeutics*, (2021).
- (61) Gagné, V. *et al.* Genes identified through genome-wide association studies of osteonecrosis in childhood acute lymphoblastic leukemia patients. *Pharmacogenomics* **20**, 1189-97 (2019).
- (62) Jarjour, S., Barrette, M., Normand, V., Rouleau, J.L., Dubé, M.P. & de Denus, S. Genetic markers associated with cutaneous adverse drug reactions to allopurinol: a systematic review. *Pharmacogenomics* **16**, 755-67 (2015).
- (63) Gonçalo, M. *et al.* HLA-B\*58:01 is a risk factor for allopurinol-induced DRESS and Stevens-Johnson syndrome/toxic epidermal necrolysis in a Portuguese population. *The British journal of dermatology* **169**, 660-5 (2013).
- (64) Chiu, M.L.S. *et al.* Association between HLA-B58:01 allele and severe cutaneous adverse reactions with allopurinol in Han Chinese in Hong Kong. *British journal of dermatology (1951)* **167**, 44-9 (2012).
- (65) Kang, H.-R. *et al.* Positive and negative associations of HLA class I alleles with allopurinol-induced SCARs in Koreans. *Pharmacogenetics and genomics* **21**, 303-7 (2011).
- (66) Sukasem, C. *et al.* HLA-B (\*) 58:01 for Allopurinol-Induced Cutaneous Adverse Drug Reactions: Implication for Clinical Interpretation in Thailand. *Frontiers in pharmacology* **7**, 186 (2016).
- (67) Kaniwa, N. *et al.* HLA-B locus in Japanese patients with anti-epileptics and allopurinol-related Stevens-Johnson syndrome and toxic epidermal necrolysis. *Pharmacogenomics* **9**, 1617-22 (2008).
- (68) Yu, K.H., Yu, C.Y. & Fang, Y.F. Diagnostic utility of HLA-B\* 5801 screening in severe allopurinol hypersensitivity syndrome: an updated systematic review and meta-analysis. *International journal of rheumatic diseases* **20**, 1057-71 (2017).
- (69) Chen, W.-T. & Chi, C.-C. Associations of HLA genotypes with antithyroid drug-induced agranulocytosis: A systematic review and meta-analysis of pharmacogenomics studies. *British Journal of Clinical Pharmacology* **85**, 1878-87 (2019).
- (70) Nicoletti, P. *et al.* Association of Liver Injury From Specific Drugs, or Groups of Drugs, With Polymorphisms in HLA and Other Genes in a Genome-Wide Association Study. *Gastroenterology* **152**, 1078-89 (2017).
- (71) Nicoletti, P. *et al.* HLA-DRB1\*16: 01-DQB1\*05: 02 is a novel genetic risk factor for flupirtine-induced liver injury. *Pharmacogenetics and genomics* **26**, 218-24 (2016).
- (72) Parham, L.R. *et al.* Comprehensive genome-wide evaluation of lapatinib-induced liver injury yields a single genetic signal centered on known risk allele HLA-DRB1\*07:01. *The pharmacogenomics journal* **16**, 180-5 (2016).
- (73) Singer, J.B. *et al.* A genome-wide study identifies HLA alleles associated with lumiracoxib-related liver injury. *Nature Genetics* **42**, 711-4 (2010).
- (74) Nakatani, K. *et al.* Identification of HLA-A\* 02: 06: 01 as the primary disease susceptibility HLA allele in cold medicine-related Stevens-Johnson syndrome with severe ocular complications by high-resolution NGS-based HLA typing. *Scientific reports* **9**, 1-8 (2019).
- (75) Tangamornsuksan, W. & Lohitnavy, M. Association between HLA-B\*5901 and methazolamide-induced Stevens-Johnson syndrome/toxic epidermal necrolysis: a systematic review and meta-analysis. *The Pharmacogenomics Journal* **19**, 286-94 (2019).
- (76) Yang, F. *et al.* HLA-B\*59:01: A marker for Stevens-Johnson syndrome/toxic epidermal necrolysis caused by methazolamide in Han Chinese. *The pharmacogenomics journal* **16**, (2015).



- (77) Li, X. *et al.* Association of HLA-C\*03:02 with methimazole-induced liver injury in Graves' disease patients. *Biomed Pharmacother* **117**, 109095 (2019).
- (78) Nicoletti, P. *et al.* Beta-lactam-induced immediate hypersensitivity reactions: A genome-wide association study of a deeply phenotyped cohort. *J Allergy Clin Immunol*, (2020).
- (79) Krebs, K. *et al.* Genome-wide Study Identifies Association between HLA-B(\*)55:01 and Self-Reported Penicillin Allergy. *American journal of human genetics* **107**, 612-21 (2020).
- (80) Woolley, M., Stebbings, S. & Highton, J. Statin-associated immune-mediated necrotising myopathy: a New Zealand case series showing possible overrepresentation in Pacific Islanders. *Internal Medicine Journal* **48**, 32-6 (2018).
- (81) Lee, H.Y. *et al.* Increased risk of strontium ranelate-related SJS/TEN is associated with HLA. *Osteoporosis International* **27**, 2577-83 (2016).
- (82) Yang, F. *et al.* HLA-B\*13:01 is associated with salazosulfapyridine-induced drug rash with eosinophilia and systemic symptoms in Chinese Han population. *Pharmacogenomics* **15**, 1461-9 (2014).
- (83) Hirata, K. *et al.* Ticlopidine-induced hepatotoxicity is associated with specific human leukocyte antigen genomic subtypes in Japanese patients: a preliminary case-control study. *The Pharmacogenomics Journal* **8**, 29-33 (2008).
- (84) Kindmark, A. *et al.* Genome-wide pharmacogenetic investigation of a hepatic adverse event without clinical signs of immunopathology suggests an underlying immune pathogenesis. *The pharmacogenomics journal* **8**, 186-95 (2008).
